## Anti-inflammatory therapy with nebulised dornase alfa in patients with severe COVID-19 pneumonia

Joanna C. Porter (PhD FRCP)<sup>1,2</sup>, Jamie Inshaw (PhD)<sup>3</sup>, Vincente Joel Solis<sup>2</sup>, Emma Denny (MRCP)<sup>1,2</sup>, Rebecca Evans (MD)<sup>2</sup>, Mia I. Temkin<sup>4\*</sup>, Nathalia De Vasconcelos(PhD)<sup>4\*</sup>, Iker Valle Aramburu (PhD)<sup>4\*</sup>, Dennis Hoving (PhD)<sup>4\*</sup>, Donna Basire<sup>1</sup>, Tracey Crissell<sup>2</sup>, Jesusa Guinto<sup>2</sup>, Alison Webb<sup>2</sup>, Hanif Esmail (MRCP PhD)<sup>2,5</sup>, Victoria Johnston (PhD FRCP)<sup>2,5</sup>, Anna Last (PhD FRCP)<sup>2,6</sup>, Thomas Rampling (MD PhD)<sup>2,5</sup>, Bryan Williams (PhD, FRCP, FMedSci)<sup>2,5</sup>, Aiden Flynn (PhD)<sup>3</sup>, Pauline T Lukey (PhD)<sup>7</sup>, Veronique Birault (PhD)<sup>8</sup> and Venizelos Papayannopoulos (PhD)<sup>4</sup>

1. UCL Respiratory, University College London, UK
2. University College London Hospitals NHS Trust, London, UK
3. Exploristics, Belfast, N. Ireland
4. Antimicrobial Defence lab, The Francis Crick Institute, London, UK
5. National Institute for Health Research, University College London Hospital Biomedical Research Centre, UK
6. Clinical Research Department, London School of Hygiene and Tropical Medicine, London, UK
7. Target to Treatment Consulting Ltd, Stevenage, UK
8. Translation, The Francis Crick Institute, London, UK

### Correspondence:

Professor Joanna C Porter, [joanna.porter@ucl.ac.uk](mailto:joanna.porter@ucl.ac.uk)

Venizelos Papayannopoulos, [veni.p@crick.ac.uk](mailto:veni.p@crick.ac.uk)

\*contributed equally

**NOTE: This preprint reports new research that has not been certified by peer review and should not be used to guide clinical practice.**

## ABSTRACT

### Background:

SARS-CoV2 infection causes severe, life-threatening pneumonia. Hyper-inflammation, coagulopathy and lymphopenia are associated with pathology and poor outcomes in these patients. Cell-free (cf) chromatin is prominent in COVID-19 patients, amplifies inflammation and promotes coagulopathy and immune dysfunction. We hypothesized that cf-chromatin clearance by nebulised dornase alfa may reduce inflammation and improve disease outcomes. Here, we evaluated the efficacy of nebulized dornase alfa in patients hospitalised with severe COVID-19 pneumonia.

### Methods:

In this randomised controlled single-centre phase 2 proof-of-concept trial, we recruited adult patients admitted to hospital that exhibited stable oxygen saturation ( $\geq 94\%$ ) on supplementary oxygen and a C-reactive protein (CRP) level  $\geq 30\text{mg/L}$  post dexamethasone treatment. Participants were randomized at a 3:1 ratio to receive twice-daily nebulised dornase alfa in addition to best available care (BAC) or BAC alone for seven days or until hospital discharge. A 2:1 ratio of historical controls to treated individuals (HC, 2:1) were included as the primary endpoint comparators. The primary outcome was a reduction in systemic inflammation measured by blood CRP levels over 7 days post-randomisation, or to discharge if sooner. Secondary and exploratory outcomes included time to discharge, time on oxygen, D-dimer levels, lymphocyte counts and levels of circulating cf-DNA.

### Results:

We screened 75 patients and enrolled 39 participants out of which 30 in dornase alfa arm, and 9 in BAC group. We also matched the recruited patients in the treated group (N=30) to historical controls in the BAC group (N=60). For the the primary outcome, 30 patients in the dornase alfa were compared to 69 patients in the BAC group. Dornase alfa treatment reduced CRP by 33% compared to the BAC group at 7-days (P=0.01). The dornase alfa group least squares mean CRP was 23.23 mg/L (95% CI 17.71 - 30.46) and the BAC group 34.82 mg/L (95% CI 28.55 – 42.47). A significant difference was also observed when only randomised participants were compared. Furthermore, compared to the BAC group, the chance of live discharge was increased by 63% in the dornase alfa group (HR 1.63, 95% CI 1.01 – 2.61, P=0.03), lymphocyte counts were improved (least-square mean: 1.08 vs 0.87, P=0.02) and markers of coagulopathy such as D-dimer were diminished (least-square mean: 570.78 vs 1656.96 $\mu\text{g/mL}$ , P=0.004). Moreover, the dornase alfa group exhibited lower circulating cf-DNA levels that correlated with CRP changes over the course of treatment. No differences were recorded in the

rates and length of stay in the ICU or the time on oxygen between the groups. Dornase alfa was well-tolerated with no serious adverse events reported.

**Conclusions:**

In this proof-of-concept study in patients with severe COVID-19 pneumonia, treatment with nebulised dornase alfa resulted in a significant reduction in inflammation, markers of immune pathology and time to discharge. The effectiveness of dornase alfa in patients with acute respiratory infection and inflammation should be investigated further in larger trials.

Trial registration number: NCT04359654

## Introduction

The clinical spectrum of SARS-CoV-2 infection (COVID-19) encompasses asymptomatic infection, mild upper respiratory tract illness (majority of cases) through to severe pneumonia, coagulopathy, respiratory failure and death (Siddiqi and Mehra, 2020; Zhou et al., 2020). C-reactive protein (CRP) is a prognostic marker that correlates with clinical symptoms, inflammation, and response to therapy. In severe COVID-19 pneumonia excessive and inappropriate activation of neutrophils can result in the formation of neutrophil extracellular traps (Radermecker et al., 2020; Zuo et al., 2020). NETs are composed of DNA, histones, and other neutrophil components and have been detected in the lungs and the circulation and may contribute to organ damage by promoting coagulopathy and endothelial dysfunction (Demers et al., 2012; Fuchs et al., 2010; Jimenez-Alcazar et al., 2015; Jimenez-Alcazar et al., 2017; Semeraro et al., 2011). Moreover, extracellular histones from NETs and dying lymphocytes are highly proinflammatory and promote inflammation and lethality during sepsis (Ioannou et al., 2021; Tsourouktsoglou et al., 2020; Xu et al., 2009). Consistently, DNase treatment has been beneficial in reducing pathology associated with pulmonary viral infections (Cortjens et al., 2018; Pillai et al., 2016). We hypothesised that a treatment that enhances cf-DNA clearance is likely to reduce downstream pathology such as the exacerbated inflammation, immune dysfunction and coagulopathy that characterises severe COVID-19 pneumonia and may ultimately save lives.

Pulmozyme<sup>®</sup>, dornase alfa, is a recombinant human DNA-ase that has been approved since 1993 as a nebulised treatment, for patients with cystic fibrosis (CF) (Lazarus and Wagener<sup>†</sup>, 2019). Dornase alfa reduces sputum viscosity to promote airway clearance and is safe and well tolerated in this disease group. Dornase alfa has also been shown to solubilize NETs, reduce inflammation and improve pulmonary function in both chronic, and acute exacerbations of CF (Konstan and Ratjen, 2012; Papayannopoulos et al., 2011). Pulmozyme<sup>®</sup> is safe and well-tolerated in children and adults with CF at doses ranging from 2.5mg qds to 10mg BD.

---

Here we report the results of the COVASE study, a Phase IIa trial that was designed to evaluate the safety of nebulised Pulmozyme<sup>®</sup> and its efficacy in reducing hyperinflammation in hospitalised patients with severe COVID-19 pneumonia, as measured by C-reactive protein (CRP), as well as evaluate potential clinical benefits.

## Materials and Methods

### TRIAL OVERSIGHT

The COVASE trial was sponsored by University College London, carried out at University College London Hospitals (UCLH). The trial protocol and the statistical analysis plan are available in the Appendix. The COVASE trial was reviewed by an Independent Ethics Committee or Institutional Review Board: the South Central - Hampshire B Research Ethics Committee Level 3 Block B Whitefriars Lewins Mead Bristol BS1 2NT, chaired by Professor Vincenzo Libri (REC reference: 20/SC/0197, Protocol number: 132333, RAS project ID:283091) and the United Kingdom Medicines and Healthcare products Regulatory Agency (MHRA). The trial was conducted in accordance with the principles of the Declaration of Helsinki and the ethical guidelines of the Council for International Organizations of Medical Sciences, applicable International Council for Harmonisation Good Clinical Practice guidelines, and applicable laws and regulations. All the randomized participants provided written informed consent. Consent for the historical controls was covered by the Health Service (Control of Participant Information) Regulations 2002 that allows the processing of Confidential Participant Information (CPI) for specific purposes. Regulation 3 provides for the processing of CPI in relation to communicable diseases and other threats to public health and in particular, allows the Secretary of State to require organisations to process CPI for purposes related to communicable diseases. The COVID-19 pandemic is covered by this legislation which allows a range of purposes related to diagnosing, managing, and controlling the spread of COVID-19. The sponsors designed the trial, in collaboration with the investigators at the Francis Crick institute, Exploristics and Target to Treatment Consulting, and the sponsors and trial investigators participated in data collection, analysis, and interpretation. The authors made the decision to submit the manuscript for publication and vouch for the accuracy and completeness of the data presented and for the fidelity of the trial to the protocol. The COVASE study was registered on clinicaltrials.gov identifier: NCT04359654. Safety and data integrity were regularly reviewed by the Trial Monitoring Group and Data Monitoring Committee.

### PARTICIPANT POPULATION

Adults ( $\geq 18$  years of age) admitted to UCLH with confirmed SARS-Cov2 infection by reverse-transcriptase–polymerase-chain-reaction and radiologically confirmed COVID-19 pneumonia on chest radiograph or CT-scan; an oxygen saturation below 94% requiring the use of supplemental oxygen; and evidence of hyperinflammation (C-reactive protein [CRP]  $\geq 30$  mg/L, after administration of dexamethasone) were eligible (RECOVERY Collaborative Group et al., 2021). Participants that had unstable ventilatory requirements or needed intubation and ventilation within 24 hours of admission

were excluded. Full inclusion and exclusion criteria can be found in the Protocol: Supplementary Appendix (SA)1.

## TRIAL DESIGN

The COVASE trial was a single-site, randomised, controlled, parallel, open-label investigation of the effect of dornase alfa on hyperinflammation in hospitalised participants with COVID-19. As illustrated, screening was performed within 24 hours prior to the administration of dornase alfa (**Figure 1A**). Eligible, consented participants were randomly assigned at a 3:1 ratio with the use of a closed envelope system to receive either best available care (BAC) plus nebulised dornase alfa or BAC alone. On Day 1 the first baseline sample was collected prior to dornase alfa administration. Thereafter, from Day 1 to Day 7 of the trial participants randomised to the active arm, received 2.5mg BD of nebulised dornase alfa in addition to BAC. In all cases BAC included dexamethasone (6 mg/day) for 10 days or until hospital discharge, whichever was shorter as per the RECOVERY trial (Ahmed and Hassan, 2020; RECOVERY Collaborative Group et al., 2021). Participants received additional treatments at the discretion of their physicians. The primary analysis was performed on samples up to Day 7, and the final trial visit occurred at day 35. In addition to participants randomised to receive BAC alone, for every COVASE participant randomised to active treatment, 2 matched historical controls were included. Historical controls (HCs) had been admitted to UCLH and treated with the same BAC treatment strategy, including dexamethasone. HCs were identified from a database of >600 patients, and matched for age, gender, BMI, comorbidities and CRP (either pre-or post-dexamethasone to provide 2 HC populations). In most cases the patients in the historical controls were admitted concomitantly with the participants recruited to the trial. Additional details regarding the trial design are provided in the protocol (SA1).

## EVALUATIONS

For this trial, baseline was defined as the last observation before the administration of dornase alfa on Day 1 for participants randomized to BAC+ dornase alfa, or the first observation after the first dose of dexamethasone for participants randomized to BAC and for HC. The participants' clinical status was assessed each day for requirement for supplementary oxygen, admission to the intensive care unit (ICU), ventilation or high flow oxygen, and standard clinical measurements: respiration rate, oxygen saturation, systolic blood pressure, pulse rate, level of consciousness, and temperature. On day 1, and alternate days thereafter until day 7 or discharge, whichever was sooner, blood was collected for routine analysis of CRP, clinical laboratory parameters and exploratory endpoints. Participants were

followed until discharge or death and/or at a follow up of at least 28 days after the last treatment day (Day 35).

## OUTCOMES

The primary efficacy outcome was the least square mean CRP up to 7 days or at hospital discharge whichever was sooner. Prespecified secondary efficacy outcomes included days on oxygen; time to hospital discharge; clinical status at day 7 on the ordinal scale; mortality by day 35; changes in clinically relevant biomarkers including blood lymphocyte count and D-dimer levels. Other secondary outcomes were the time until discharge alive, initiation of mechanical ventilation, or ICU transfer; and the duration of ICU stay. Adverse events were recorded according to the system organ class and preferred terms in the Medical Dictionary for Regulatory Activities, version 23.0.

## STATISTICAL ANALYSIS

As pre-specified in the statistical analysis plan, efficacy assessments of the primary and secondary outcomes in the modified intention-to-treat population were performed, these included all the participants who had undergone randomization, and, for those randomized to active treatment, had received at least one dose of dornase alfa. A sample size of 90 participants was calculated to provide a power of 80% to determine a between-group difference of >40% in the primary outcome (CRP at day 7), a difference we considered both achievable and clinically relevant. To achieve the required power, 30 participants in the active treatment group and 60 in the control group were required. An additional 10 participants were randomised to BAC alone as a control for the exploratory endpoints and to compare the characteristics of enrolled participants with the historical controls. This gave a total of 40 participants enrolled in the study (30 on BAC plus dornase alfa and 10 on BAC alone, of which 30 and 9 were evaluable) and 60 historical controls which were selected using propensity score matching, with age, Sex, BMI, baseline CRP, and whether or not they had a key comorbidity, defined as one or more of hypertension, diabetes or cardiovascular disease included as covariates to ensure these characteristics were as balanced as possible between those randomised to dornase alfa and the historical controls.

All baseline data, demographics, endpoints, safety, and tolerability were summarised overall and by treatment group and by day. In general, continuous data was summarised using the mean (standard deviation), median (1st and 3rd quartiles), minimum and maximum, and categorical data was represented as frequency counts (percentages).

For analyses relating to the primary objective, group comparisons were performed using a repeated measures mixed model, adjusted for baseline factors and with treatment as the main effect. Prior to analysis, primary and secondary endpoints were assessed for conformance to normality assumptions and the appropriate transformation was conducted if necessary.

A re-estimation of the sample size was carried out following an interim analysis when 12 participants had been randomised.

Safety was assessed in the randomised population. Full details of the planned statistical analysis are presented in the Statistical Analysis Plan (SAP; Supplementary Appendix 2).

Exploratory endpoints were only available in the randomised participants and not in the historical controls. In this case, a *post hoc* within group analysis was conducted to compare baseline and post-baseline measurements.

#### EXPLORATORY ENDPOINT ANALYSIS

Peripheral venous blood was collected into EDTA or Heparin tubes, depending on clinic availability, and layered on Histopaque 1119 (Sigma-Aldrich) and centrifuged for 20 min at 800x g. The plasma, PBMC and neutrophil layers were collected and neutrophils were washed in Hyclone Hank's Balanced Salt Solution (HBSS) without calcium, magnesium or phenol red (GE Healthcare) supplemented with 10mM HEPES (Invitrogen) 0.1% FCS and further fractionated on a discontinuous Percoll (GE Healthcare) gradient consisting of layers with densities of 1105 g/ml (85%), 1100 g/ml (80%), 1093 g/ml (75%), 1087 g/ml (70%), and 1081 g/ml (65%) by centrifugation for 20 min at 800x g. Neutrophil enriched layers were collected and washed. Plasma was centrifuged to remove cell debris and flash frozen in liquid nitrogen, subsequently thawed and DNA levels were measured in a fluorescence plate reader using the Quant-iT™ PicoGreen dsDNA Assay Kit (P7589) from Thermofisher. Data were analysed using Microsoft Excel and Graph Pad Prism software.

#### INFORMED CONSENT AND ETHICS FOR HEALTHY CONTROL SAMPLES

For the cf-DNA measurements in the blood of healthy control donors, peripheral blood was isolated from consenting healthy adult volunteers, according to approved protocols of the ethics board of the Francis Crick Institute and the Human Tissue act.



## Results

### PATIENT CHARACTERISTICS

From May 2020-October 2021, 41 participants were randomised but 1 participant in the BAC group was discharged from hospital before a second CRP measurement (**Figure 1B**). This participant was excluded from all analyses, except for the safety analyses. One participant withdrew consent prior to receiving any dose of dornase alfa and was replaced and excluded from all analyses. 39 participants were included in the intention-to-treat analysis set, 30 in the BAC + dornase alfa group and 9 in the BAC group. There was one treatment discontinuation, after one dose of dornase alfa, which was the participant's decision due to a "tingling of the mouth, cough, shortness of breath" reported after receiving dornase alfa. This participant was removed from the per protocol population. All 39 participants were followed up for 35 days or until death whichever was sooner.

Two participants were excluded from the per-protocol population. One from the BAC as randomisation occurred prior to dexamethasone being widely used in the treatment of COVID-19 and they were the only participant in the analysis set not to be on dexamethasone at the start of follow-up; and a second participant who withdrew after one dose of dornase alfa due to side-effects from the medication (**Figure 1B**)

Baseline characteristics were generally well balanced across groups (BAC + dornase alfa, BAC, and historical controls/BAC; Table 1). Selection of historical controls via propensity score matching was successful in ensuring the means of the characteristics included in the propensity score matching were similar to those observed in the BAC + dornase alfa arm (**Table 1**), as well as having similar overall distributions (**Supplementary Figure 1**).

The overall mean age was 56.8 years (mean in BAC + dornase alfa group=56.8 years, mean in BAC group=56.8 years). The percentage of males was 75.8% overall (76.7% BAC + dornase alfa group, 75.4% BAC group). The most prevalent ethnicity was "White British", with 30.3% of participants identifying in that category overall (33.3% BAC + dornase alfa group, 29.0% BAC group). The overall mean BMI was 28.0kg/m<sup>2</sup> (mean in BAC + dornase alfa group=27.8kg/m<sup>2</sup>, mean in BAC group=28.2kg/m<sup>2</sup>). The mean baseline CRP (post dexamethasone) as defined in the primary analysis was 100.2mg/L (mean in BAC + dornase alfa group=101.9mg/L, mean in BAC group=99.5mg/L). The overall proportion of participants with a key comorbidity, defined as one or more of hypertension, diabetes, or cardiovascular disease, was 52.5% (46.7% BAC + dornase alfa group, 55.1% BAC group).

All but one (38/39) of the randomised participants received dexamethasone prior to randomisation, and 48 of the total 99 participants also received remdesivir or tocilizumab in addition to dexamethasone within the first 7 days.

The last pre-dexamethasone CRP was also similar between groups, with an overall mean of 125.0mg/L (mean in BAC + dornase alfa group=128.1mg/L, mean in BAC group=122.7mg/L). The number of days between dexamethasone initiation and baseline was 1.2 days overall (mean in BAC + dornase alfa group=0.7 days, mean in BAC group=1.3 days).

There were imbalances noted at baseline between the groups in white blood cell count, neutrophil count, procalcitonin count and D-dimer (**Supplementary Table S1**)

## CLINICAL OUTCOMES

### *Primary outcome*

Individual CRP traces over time for each patient are shown in **Figure 1C**. Blood collection for both BAC and BAC + DA groups occurred at similar times and frequencies over the course of treatment (**Supplementary Figure 2A**). For the ITT group, the LS mean log (CRP) over 7 days follow-up was 3.15 (95% confidence interval [CI] 2.87 to 3.42) in the BAC + dornase alfa group (n=30), and 3.55 (95% CI, 3.35 to 3.75) in the BAC group (n=69; Table 2; **Figure 1D**), p=0.01. This indicates a reduction in mean CRP of approximately 33% in the BAC + dornase alfa group (23.23 mg/mL) compared to the BAC group (34.82 mg/mL) at the mean follow-up over 7 days.

This effect of dornase alfa on CRP was confirmed in various other subgroup analyses and are shown in Table 2: the per-protocol population only (**Figure 1E, top**); participants who were randomised into the COVASE trial, i.e., excluding the historical controls (**Figure 1E, bottom**); participants who were randomised to BAC + dornase alfa in the COVASE trial, and HC, i.e. excluding those randomised to BAC only (**Table 2**).

In addition, to ensure that the HCs did not have a significantly different CRP trajectory to those randomised to BAC, we compared participants who were randomised to BAC with HC by excluding those randomised to BAC + dornase alfa and found no significant differences (**Table 2**).

Sensitivity analyses were also conducted and continued to support the observed effect on CRP. These are also shown in Table 2 and included: log(CRP) as an area under the curve; historical controls matched for their last pre-dexamethasone CRP measurement as opposed to their first CRP after starting dexamethasone; and the effect of remdesivir or tocilizumab.

---

### *Secondary outcomes*

Length of hospitalisation was analysed as a time-to-event outcome of alive discharge from hospital censored at 35 days. The hazard ratio observed in the Cox proportional hazards model was 1.63 (95% CI, 1.01 to 2.61),  $p=0.03$  (**Table 3 and Figure 2A**). Showing that throughout 35 days follow-up, there was a 63% higher chance of discharge alive at any given time-point in the BAC + dornase alfa group compared to the BAC group. This trend was also seen if just the COVASE participants were considered, although not powered to reach significance, and with a smaller HR 1.18 (95% CI, 0.52-2.69),  $p=0.62$ , (**Supplementary Table 2 and Supplementary Figure 2B**).

Over 7 days of follow up there was no significant difference between BAC + dornase alfa versus BAC alone in either: % of participants admitted to ICU (23.3% versus 21.74%),  $p=0.866$ , or length of ICU stay, least squares mean 21.25 (95% CI, 4.65 to 37.84) hours versus 19.85 (95% CI, 8.00 to 31.70) hours,  $p=0.883$ . The same was seen over 35-day follow-up, with least squares mean 55.21 (95% CI, -23.59 to 134.00) hours versus 60.60 (95% CI, 4.34 to 116.86) hours,  $p=0.905$ . At any point during the 35 days follow-up, 23% of the BAC + dornase alfa group were admitted to ICU compared to 23.19% in the BAC group,  $p=0.983$  (**Supplementary Table 3**).

There was no significant difference in time requiring oxygen between the two groups, at either 7 days, least squares mean 94.32 (95% CI, 72.8 to 115.79) hours, versus 88.96 (95% CI, 73.64 to 104.29) hours,  $p=0.662$ , or 35 days, least squares mean 133.22 (95% CI, 52.01 to 214.43) hours versus 156.35 (95% CI, 98.36, 214.33) hours,  $p=0.618$ . At 35 day follow up if we look at COVASE participants, there are only 9 participants to evaluate, but mean oxygen use tends to a reduction of 123 hours with BAC + dornase alfa, versus 241 hours for BAC,  $p=0.187$  (**Supplementary Table 3**).

Over 35 days follow up, 1 person amongst the 30 patients in the BAC + dornase alfa group died, compared to 8 of the 69 participants in the BAC group. The hazard ratio observed in the Cox proportional hazards model was 0.47 (95% CI, 0.06 to 3.86), indicating a trend towards a reduced chance of death at any given time-point in the BAC + dornase alfa group compared to the BAC group, but this did not reach significance  $p=0.460$  (**Figure 2B**).

There was no significant difference at either 7- or 35-days follow-up, in the number of participants that required mechanical ventilation in the BAC + dornase alfa group compared with the BAC group (16.67% vs 13.04%),  $p=0.628$ . Amongst participants that were ventilated, the mean length of mechanical ventilation at 7 days follow-up in the BAC + dornase alfa group was 76.8 hours, compared to 88.78 in the BAC group. At 35 days follow-up, the mean length of mechanical ventilation in the BAC + dornase alfa group was 76.8, compared to 411.17 in the BAC group (**Supplementary Table 3**).

There was no significant difference in superadded bacterial pneumonia at either 7- or 35-days follow-up: 7 days, 1 (3.33%) participant in the BAC + dornase alfa group compared to 3 (4.35%) participants in the BAC group,  $p=0.934$ ; 35 days, 2 (6.67%) participants in the BAC + dornase alfa group had bacterial pneumonia, compared to 3 (4.35%) participants in the BAC group,  $p=0.548$  (**Supplementary Table 3**).

Blood analysis with no adjustment for multiple testing showed a significant treatment effect in BAC + dornase alfa group vs. BAC group for three parameters: lymphocyte counts, D-dimer, a marker of coagulation and procalcitonin (PCT).

First, the dornase alfa treated group exhibited higher lymphocyte counts with a least-squares mean of 0.87 (95% CI, 0.76-0.98) in the BAC group vs. 1.08 (95% CI, 0.92-1.27) in the BAC + dornase alfa group,  $p=0.02$  (**Table 3 and Supplementary Table 2**). Patients with lymphopenia at baseline ( $<1 \times 10^9$  lymphocytes/L) exhibited larger increases in blood lymphocyte numbers in the BAC + dornase alfa group than in the BAC group during the entire length of treatment (**Figure 2C**).

Furthermore, D-dimer levels were lower in the BAC + dornase alfa group compared to the BAC group, with a least-squares mean D-dimer difference of 1657 (95% CI, 3131-877) (**Table 3, Supplementary Table 2, Figure 2D and Supplementary Figure 2C**).

Procalcitonin (PCT) is marker of bacterial infection that is also elevated in many patients with severe COVID-19 infection. Our analysis indicated lower levels of PCT in patients that received dornase alfa, with a mean value of 0.18 ng/mL (95% CI, -0.2-0.56) compared to those treated with BAC alone with a mean of 1.31 ng/mL (95% CI, 0.56-2.05),  $p=0.005$  (**Table 3**). On repeat analysis excluding the historical control population the results were replicated and changes in these 3 parameters reached statistical significance (**Supplementary table 2**).

#### *Exploratory outcomes*

Given the role of circulating cf-DNA in pathology, we examined whether the pulmonary administration of dornase alfa, influenced systemic cf-DNA levels in the plasma. There was no difference in baseline

plasma cf-DNA levels on Day 1 between the two groups. However, during the treatment period cf-DNA was reduced in participants randomised to BAC+ dornase alfa compared to BAC alone (**Figure 2E and Supplementary Figure 2D**). We also examined whether cf-DNA levels correlated with D-dimer and CRP levels. Samples that contained cf-DNA above 100µg/mL exhibited significant higher D-dimer levels compared to samples containing cf-DNA levels below 100µg/mL (**Supplementary Figure 2E**). Moreover, there was a positive correlation between the levels of cf-DNA in the final sample collected during the treatment period and the ratio of final to baseline CRP ( $CRP_{final}/CRP_{baseline}$ ) indicating that changes in CRP were inversely proportional to the final cf-DNA levels in all patients independently of treatment (**Figure 2F**).

### *Safety*

Dornase alfa was very well tolerated, with no systemic effects and this was consistent with its short half-life and lack of systemic exposure. There were 10 reported AEs by 9 participants in the randomised BAC arm versus 30 AEs reported by 30 participants in the BAC + dornase alfa arm. Of these, one was reported by the clinical team as definitely related to the study drug and one as unlikely to be related to the study drug (Supplementary Table S4). 'Tingling of the mouth' after using the nebuliser was attributable to the drug whilst 'headache' was unlikely to be related to the study drug. The AE data reflect the clinical trial and post-marketing experience of using Pulmozyme at the recommended dose regimen. Adverse reactions attributed to Pulmozyme are reported as rare (< 1/1000). No treatment-related serious adverse events (SAEs) occurred in any participants.

## Discussion

In this Phase IIa trial involving hospitalised participants with severe COVID-19 pneumonia and systemic inflammation, we found that nebulised human recombinant DNA-ase (dornase alfa) significantly reduced CRP over 7 days, versus BAC, which included dexamethasone, alone. The finding was robust after several sensitivity analyses and no safety concerns resulted from the use of dornase alfa in this patient group. No mortality benefit was associated with this reduction, although this phase IIa trial was not powered for this outcome. The data suggested that treatment with dornase alfa may reduce time to discharge over 35 days follow up. A finding that warrants further study. Adverse events were balanced between the two groups with no treatment related SAEs.

CRP, produced by the liver, correlates with IL-6 and is a widely used marker of systemic inflammation. In blood the normal concentration of CRP is  $<0.8$  mg/L but it rises rapidly peaking at 48h from disease onset with a half-life of  $\sim 19$ h. A raised CRP above 40 mg/L distinguishes patients with severe COVID-19 from those with mild illness (Chen et al., 2020). We chose CRP as our primary endpoint as it is easily measured and is highly responsive to treatments that reduce inflammation. In August 2020, the results of the RECOVERY trial resulted in dexamethasone becoming standard care in patients with COVID-19 pneumonitis requiring supplemental oxygen (Ahmed and Hassan, 2020; Group et al., 2021). At that stage, having recruited only one participant, we recruited participants dependent on a  $CRP \geq 30$  mg/L, on the day after receiving their first dexamethasone dose to minimise steroid-dependent effects on CRP. Our finding that dornase alfa can significantly reduce CRP, even in participants treated with dexamethasone, is compelling and suggests a complementary mode of action. Our data indicate that while dexamethasone reduces CRP, a substantial number of patients benefit from the addition of dornase alfa to deliver more sustained reduction in inflammation. Moreover, given the safety record and mechanism of action, dornase alfa may also prove suitable for the treatment of patients with mild viral pneumonia, in contrast to dexamethasone which is only effective in those patients with an oxygen requirement, and potentially harmful in milder cases (Ahmed and Hassan, 2020).

Early in the pandemic it was recognised that hyperinflammation and a robust dysregulated host immune response were a key part of the pathophysiology of COVID-19 pneumonia. Cellular debris, including histone-DNA complexes released from inflammatory cells (including neutrophils) and epithelial cells contributes to the inflammation seen in other viral pneumonias (Cortjens et al., 2018; Pillai et al., 2016). The DNA bound to the histone, acts to synergise the effect of DAMPs to augment TLR4-mediated inflammatory pathways (Tsourouktsoglou et al., 2020). By stripping DNA, the complexes are reduced to naked histones which are then cleared by serum proteases or NET proteases

without inflammation (Ioannou et al., 2021). These naked histones are no longer able to augment the proinflammatory DAMPs. It is proposed that such targeting will result in a reduction in excessive inflammation whilst maintaining immune competence for pathogen clearance.

The design and conduct of a clinical trial involving COVID-19 participants presented many challenges. Our trial population was heterogeneous and reflected real world practice. In the UK, at the time of starting the study there was little support for COVID-19 studies outside approved national platform trials. We were therefore limited in access to patients with COVID-19 and used historical controls to allow us to complete the study more quickly and match patients more closely. Still these historical controls include patients that had been admitted on days when competing studies were unable to recruit because of clinical trials pharmacy closures, or patients that had been recruited to the BAC arm of other clinical trials. The historical controls all met the inclusion criteria for COVASE and did not meet any exclusion criteria. They were matched as closely as possible for key parameters and comorbidities. Despite this potential heterogeneity we were still able to show a reduction in CRP and a tendency to reduce hospital stay as well as the number of days on oxygen in dornase alfa treated participants.

The effects of a fast-growing pandemic affecting millions meant that a lack of standardized treatment and introduction of new treatments was a challenge. Our trial was not powered to overcome confounders, such as the use of antivirals and tocilizumab, an IL-6 inhibitor, recognised to reduce CRP (Galvan-Roman et al., 2021). However, both in participants that had received tocilizumab and/or remdesivir, and those that had not, although underpowered and not reaching statistical significance, we did still demonstrate a trend to a reduction in CRP with dornase alfa in all groups.

Together with raised CRP, two additional features characteristic of many patients with severe COVID-19 are hypercoagulability, with raised D-dimers, and lymphopenia. With the caveat that the small numbers of participants necessitate a degree of caution, we found that both CRP and D-dimers correlated with cf-DNA in all patients and that dornase alfa led to a reduction in both. Our finding that D-dimer is reduced back to normal levels over 7 days in participants in the BAC + dornase alfa group but not in participants on BAC alone, alongside the restoration of lymphocyte counts, suggest wider effects of dornase alpha that may be attributable, in part, to a reduction in cf-DNA. It is therefore tempting to propose that by promoting extracellular DNA degradation in the alveolar space, dornase alfa may be impacting favourably on coagulopathy and leukocyte trafficking in these patients (Radermecker et al., 2020).



One surprising aspect of our study was the reduction of systemic levels of cf-DNA in the circulation in dornase alfa treated patients, given that the treatment is not systemic but localized to the lung due to the short half-life of nebulized dornase-alpha in the bloodstream. Hence, these results suggest that decreases in blood cf-DNA levels reflect decreases in pulmonary cf-DNA by enhanced local clearance of NETs and DNA released by other dying cell types. Furthermore, we noted an inverse correlation between the final readings of circulating cf-DNA and the magnitude of decrease in CRP within the 7-day treatment period, further supporting a functional link between chromatin levels and systemic inflammation in COVID-19 pneumonitis. Another reason why recombinant DNase treatment is beneficial relates to the recent discovery that a significant number of SARS-CoV-2 and microbial sepsis patients exhibit defects in plasma cf-DNA degradation (Aramburu et al., 2022). Therefore, while acute infection drives aberrant activation of the immune system, leading to exacerbated cf-DNA release, deficiencies in cf-DNA clearance are a critical factor that determines how patients cope with immune pathology.

Since this study was initiated, our understanding of COVID-19 infection and the relevant therapeutic options has improved. Whilst immunisation has greatly reduced the numbers of patients admitted to hospitals with COVID-19 pneumonia there is still a need for better therapies, particularly those that are virally agnostic and retain efficacy even as viruses mutate and in potential future pandemics. A further advantage of nebulised dornase alfa is that it can be safely administered outside the health-care setting, as demonstrated by the millions of children and adults with CF that take this drug at home daily. It takes only a few minutes to administer and is well tolerated. Dornase alfa may be of benefit in patients not requiring hospital admission, or patients that are too frail to be moved into a clinic and risk additional exposure to nosocomial pathogens. We did not formally measure patient satisfaction but many of the patients derived immediate symptomatic benefit from the nebulised treatment.

---

Ten other trials of dornase alfa in patients with COVID-19 are registered on ClinicalTrials.gov (NCT04432987, NCT04387786, NCT04409925, NCT0442970, NCT04402944, NCT04445285, NCT05139901, NCT04355364, NCT04459325, NCT04488081). Of these only three trials (NCT04432987, NCT04387786, NCT04402970) have data published in peer reviewed manuscripts reporting predominately improvements in oxygen requirements (Holliday et al., 2021; Okur et al., 2020; Weber et al., 2020). Another study issued a press release after an interim analysis, resulting in termination of the dornase alfa arm in a platform trial (NCT04488081). In addition, one study indicated improvements in the plasma and sputum proteomic profile and NET clearance in the sputum of patients receiving dornase alfa (Fisher et al., 2021). However, these studies examined a small number



of patients and the study designs, patient populations and endpoints differ from those used in the COVASE. While these trial design differences make it currently challenging to reach definitive conclusions about the efficacy of dornase alfa in COVID-19, based on the totality of the available data, the overall trend appears to be positive. It is possible that a meta-analysis may be helpful once the results of all of these trials are publicly available.

In conclusion, we have demonstrated that nebulised dornase alfa significantly reduces inflammation as measured by CRP in hospitalised patients with severe COVID-19 pneumonia, and we show a trend towards clinical benefit with reduced oxygen requirements and earlier discharge from hospital in patients that received this treatment. These very encouraging preliminary findings warrant further investigation in larger studies.

---

## Acknowledgements

We thank the patients, caregivers, and families who participated in the trial; and acknowledge the help of the following: Additional BRC Contributors: Margaret Duku, Gulden Geneci, Farah Islam, Ciprian-Ionut Matei, Marta Merida, Eleni Nastouli, Marivic Ricamara, Anisa Tariq. Pharmacy: Matthew Baker, Nina Bason, Chi Yee Chung, Zoila Gilham-Fernandez, Temi Olusi. Sponsors/UCL: Liam Banks, Helen Cadiou, Novin Fard, Farhat Gilani, Vince Greaves, Yusuf Jaami, Pushpsen Joshi, Misha Ladva, David Lomas, Catherine Maidens, Anthea Mo, Anisha Nayar, Nick McNally, Samim Patel. Data Monitoring Committee: Balaji Ganeshan, Maria Leandro, Kay Roy. COVID Clinical Consultants: Diana Ayoola, Robin Bailey, David Brealey, Mike Brown, Anna Checkley, Charlie Coughlan, Philip Gothard, Robert Heyderman, Sarah Logan, Nicky Longley, Jessica Manson, Michael Marks, David Moore, Neil Stone, Emma Wall. T8 Nursing Staff: Adam Cureton-Griffiths, Amy Mann, Laura Nichols, Pantelis Savvides. NOCRI Respiratory Translational Research Collaboration: Chris Brightling, Jane Davies, Ratko Djukanovic, Liam Heeney, Ling-Pei Ho, Alex Horsley, Tracy Hussell, Stefan Marciniak, Lorcan McGarvey, Thomas Wilkinson. Pari/Roche/LifeArc: Mal Apter, Ruth Davies, Ciara O'Brien, Pauline Stasiak, Davia Viellec. This work was supported by LifeArc (UCL-UCLH132333), UCL, Breathing Matters and the Francis Crick Institute which receives its core funding from the UK Medical Research Council (FC0010129), Cancer Research UK (FC0010129) and the Wellcome Trust (FC0010129). The study was undertaken at UCLH/UCL who received a proportion of funding from the Department of Health's NIHR Biomedical Research Centres funding scheme. VJS and DB are funded by the NIHR University College London Hospitals Biomedical Research Centre. I.V.A was funded by an EMBO LTF (ALTF 113-2019). **Disclosure** forms provided by the authors are available with the full text of the published article.

---

## Figure Legends

**Figure 1.** Prespecified Primary and Secondary endpoints.

**A.** COVASE Trial Design.

**B.** Consort diagram. Numbers not in parentheses indicate those in the intention-to-treat population, numbers in parentheses indicate the numbers in the per-protocol population.

**C.** Upper graph: Natural log CRP in BAC (HC and randomised participants; blue). lower graph. Natural log CRP in participants randomised to BAC+DA (pink).

**D.** Fitted mean (95% confidence interval) from mixed model, with natural log (CRP) over 7 days follow-up as the outcome, adjusting for natural log baseline CRP, age, sex, BMI, serious comorbidity (Diabetes, Cardiovascular disease or hypertension), time and a treatment × time interaction. P-value generated by comparing least-square means between arms. Intention to treat (ITT) population (Blue: HC and participants randomised to BAC, N=69; Pink: participants randomised to BAC+DA, N=30).

**E** Upper graph: Same output as **D.** but examining the PP population (Blue: HC and participants randomised to BAC, N=68; Pink: participants randomised to BAC+DA, N=29).

**E** lower graph: Same output as **D.** but examining randomised participants only: (Blue: participants randomised to BAC, N=9; Pink: participants randomised to BAC+DA, N=30).

**Figure 2.** Analysis of secondary endpoints and exploratory endpoints.

**A.** Kaplan-Meier plot showing time to discharge from hospital from baseline. ITT population. Hazard ratio from Cox proportional hazards model adjusted for baseline CRP, age, sex, BMI, serious comorbidity (Diabetes, Cardiovascular disease of hypertension). P-value from log-rank test. (Blue: HC and participants randomised to BAC, N=69. Pink: participants randomised to BAC+DA, N=30).

**B.** Kaplan-Meier plot showing time to death over 35 days follow up. ITT population. Hazard ratio from Cox proportional hazards model adjusted for baseline CRP, age, sex, BMI, serious comorbidity (Diabetes, Cardiovascular disease of hypertension). P-value from log-rank test. (Blue: HC and participants randomised to BAC, N=69. Pink: participants randomised to BAC+DA, N=30).  
Abbreviations: BAC-best available care, CRP-C-reactive protein, DA-dornase alfa, ITT-intention-to-treat, pp-per protocol.

C. Difference between the lymphocyte count for each day of the treatment period and the baseline for each patient who exhibited lymphopenia at baseline ( $>1 \times 10^9$  lymphocytes/mL). Mean and 95%CI interval is shown with statistical analysis by two-way Anova.

D. Mean D-dimer levels per day in randomised BAC (blue) and BAC+DA (pink) patients with error bars depicting 95% CI in randomised BAC (blue) and BAC+DA (DA) patients (pink). Statistical difference by mixed effects Anova analysis.

E. Mean cf-DNA levels per day in randomised BAC (blue) and BAC+DA (pink) patients, with error bars depicting standard deviation and AUC measurements shown above and statistical difference by mixed effects Anova analysis.

F. Correlation between the final cf-DNA levels and ratio of CRP at day-7 normalized to the baseline CRP ( $CRP_{final}/CRP_{baseline}$ ) per patient. Fitting by non-linear regression.

**Supplemental Figure 1.** Baseline characteristics of patients analysed in the trial.

(A-C). Violin plots (left) and frequency distribution (right) of baseline clinical parameters between patients in the historical control and randomised BAC group and the randomised BAC+Dornase alfa (BAC+DA) group. **A.** Age, **B.** Baseline CRP and **C.** Body mass index (BMI).

D. Number of male and female patients in the two groups.

E. Incidence of cardiovascular comorbidities in the two groups.

**Supplemental Figure 2.**

A. Graph depicting the periodicity and frequency of blood sample collection for all post-baseline CRP values from historical control and randomised BAC (blue) or BAC+Dornase alfa (BAC+DA, pink) patients pooled into a single timeline.

B. Kaplan-Meier plot showing time to discharge from hospital from baseline. Randomised participants only. Hazard ratio from Cox proportional hazards model adjusted for baseline CRP, age, sex, BMI, serious comorbidity (Diabetes, Cardiovascular disease of hypertension). P-value from log-rank test (Blue: participants randomised to BAC, N=9. Pink: participants randomised to BAC+DA, N=30).

C. D-dimer concentration in randomised patient post-baseline blood samples pooled into BAC and BAC + DA groups. Statistical analysis by two-tailed unpaired parametric t-test.

E. DNA concentration in randomised patient post-baseline blood samples pooled into BAC and BAC + DA groups. Statistical analysis by one-way Anova.

F. Correlation between D-dimer and cell-free (cf) DNA in the blood of patients randomised to BAC (blue) or to BAC+DA (DA) (pink), where samples have been segregated depending on whether the corresponding levels of cf-DNA were below or above 100 µg/mL. Statistical analysis by unpaired parametric t-test.

## References

- Ahmed, M.H., and Hassan, A. (2020). Dexamethasone for the Treatment of Coronavirus Disease (COVID-19): a Review. *SN Compr Clin Med*, 1-10.
- Aramburu, I.V., Hoving, D., Vernardis, S.I., Tin, M., Demichev, V., Helbig, E.T., Lippert, L., Stahl, K., Ioannou, M., Temkin, M.I., *et al.* (2022). Functional proteomic profiling links deficient DNA clearance to mortality in patients with severe COVID-19 pneumonia. *medRxiv*, 2022.2001.2025.22269616.
- Chen, T., Wu, D., Chen, H., Yan, W., Yang, D., Chen, G., Ma, K., Xu, D., Yu, H., Wang, H., *et al.* (2020). Clinical characteristics of 113 deceased patients with coronavirus disease 2019: retrospective study. *BMJ* 368, m1091.
- Cortjens, B., de Jong, R., Bonsing, J.G., van Woensel, J.B.M., Antonis, A.F.G., and Bem, R.A. (2018). Local dornase alfa treatment reduces NETs-induced airway obstruction during severe RSV infection. *Thorax* 73, 578-580.
- Demers, M., Krause, D.S., Schatzberg, D., Martinod, K., Voorhees, J.R., Fuchs, T.A., Scadden, D.T., and Wagner, D.D. (2012). Cancers predispose neutrophils to release extracellular DNA traps that contribute to cancer-associated thrombosis. *Proc Natl Acad Sci U S A* 109, 13076-13081.
- Fisher, J., Mohanty, T., Karlsson, C.A.Q., Khademi, S.M.H., Malmstrom, E., Frigyesi, A., Nordenfelt, P., Malmstrom, J., and Linder, A. (2021). Proteome Profiling of Recombinant DNase Therapy in Reducing NETs and Aiding Recovery in COVID-19 Patients. *Mol Cell Proteomics* 20, 100113.
- Fuchs, T.A., Brill, A., Duerschmied, D., Schatzberg, D., Monestier, M., Myers, D.D., Jr., Wroblewski, S.K., Wakefield, T.W., Hartwig, J.H., and Wagner, D.D. (2010). Extracellular DNA traps promote thrombosis. *Proceedings of the National Academy of Sciences of the United States of America* 107, 15880-15885.
- Galvan-Roman, J.M., Rodriguez-Garcia, S.C., Roy-Vallejo, E., Marcos-Jimenez, A., Sanchez-Alonso, S., Fernandez-Diaz, C., Alcaraz-Serna, A., Mateu-Albero, T., Rodriguez-Cortes, P., Sanchez-Cerrillo, I., *et al.* (2021). IL-6 serum levels predict severity and response to tocilizumab in COVID-19: An observational study. *The Journal of allergy and clinical immunology* 147, 72-80 e78.
- RECOVERY Collaborative Group, Horby, P., Lim, W.S., Emberson, J.R., Mafham, M., Bell, J.L., Linsell, L., Staplin, N., Brightling, C., Ustianowski, A., *et al.* (2021). Dexamethasone in Hospitalized Patients with COVID-19. *N Engl J Med* 384, 693-704.
- Holliday, Z.M., Earhart, A.P., Alnijoumi, M.M., Krvavac, A., Allen, L.H., and Schrum, A.G. (2021). Non-Randomized Trial of Dornase Alfa for Acute Respiratory Distress Syndrome Secondary to COVID-19. *Front Immunol* 12, 714833.
- Ioannou, M., Hoving, D., Aramburu, I.V., De Vasconcelos, N.M., Temkin, M.I., Wang, Q., Vernardis, S., Demichev, V., Tsourouktsoglou, T.-D., Boeing, S., *et al.* (2021). SIGNR1 promotes immune dysfunction in systemic candidiasis by modulating neutrophil lifespan via T cell-derived histones and G-CSF. *bioRxiv*, 2021.2008.2009.455510.
- Jimenez-Alcazar, M., Napirei, M., Panda, R., Kohler, E.C., Kremer Hovinga, J.A., Mannherz, H.G., Peine, S., Renne, T., Lammler, B., and Fuchs, T.A. (2015). Impaired DNase1-mediated degradation of neutrophil extracellular traps is associated with acute thrombotic microangiopathies. *J Thromb Haemost* 13, 732-742.
- Jimenez-Alcazar, M., Rangaswamy, C., Panda, R., Bitterling, J., Simsek, Y.J., Long, A.T., Bilyy, R., Krenn, V., Renne, C., Renne, T., *et al.* (2017). Host DNases prevent vascular occlusion by neutrophil extracellular traps. *Science* 358, 1202-1206.
- Konstan, M.W., and Ratjen, F. (2012). Effect of dornase alfa on inflammation and lung function: potential role in the early treatment of cystic fibrosis. *J Cyst Fibros* 11, 78-83.
- Kuri-Cervantes, L., Pampeña, M.B., Meng, W., Rosenfeld, A.M., Ittner, C.A.G., Weisman, A.R., Agyekum, R.S., Mathew, D., Baxter, A.E., Vella, L.A., *et al.* (2020). Comprehensive mapping of immune perturbations associated with severe COVID-19. *Sci Immunol* 5.
- Lazarus, R.A., and Wagener†, J.S. (2019). Recombinant Human Deoxyribonuclease I. *Pharmaceutical Biotechnology*, 471-488.

- Nalbandian, A., Sehgal, K., Gupta, A., Madhavan, M.V., McGroder, C., Stevens, J.S., Cook, J.R., Nordvig, A.S., Shalev, D., Sehwat, T.S., *et al.* (2021). Post-acute COVID-19 syndrome. *Nat Med* 27, 601-615.
- Okur, H.K., Yalcin, K., Tastan, C., Demir, S., Yurtsever, B., Karakus, G.S., Kancagi, D.D., Abanuz, S., Seyis, U., Zengin, R., *et al.* (2020). Preliminary report of in vitro and in vivo effectiveness of dornase alfa on SARS-CoV-2 infection. *New Microbes New Infect* 37, 100756.
- Papayannopoulos, V., Staab, D., and Zychlinsky, A. (2011). Neutrophil Elastase Enhances Sputum Solubilization in Cystic Fibrosis Patients Receiving DNase Therapy. *Plos One* 6.
- Pillai, P.S., Molony, R.D., Martinod, K., Dong, H., Pang, I.K., Tal, M.C., Solis, A.G., Bielecki, P., Mohanty, S., Trentalange, M., *et al.* (2016). Mx1 reveals innate pathways to antiviral resistance and lethal influenza disease. *Science* 352, 463-466.
- Radermecker, C., Detrembleur, N., Guiot, J., Cavalier, E., Henket, M., d'Emal, C., Vanwinge, C., Cataldo, D., Oury, C., Delvenne, P., and Marichal, T. (2020). Neutrophil extracellular traps infiltrate the lung airway, interstitial, and vascular compartments in severe COVID-19. *J Exp Med* 217.
- Semeraro, F., Ammollo, C.T., Morrissey, J.H., Dale, G.L., Friese, P., Esmon, N.L., and Esmon, C.T. (2011). Extracellular histones promote thrombin generation through platelet-dependent mechanisms: involvement of platelet TLR2 and TLR4. *Blood* 118, 1952-1961.
- Siddiqi, H.K., and Mehra, M.R. (2020). COVID-19 illness in native and immunosuppressed states: A clinical-therapeutic staging proposal. *J Heart Lung Transplant* 39, 405-407.
- Tsourouktsoglou, T.D., Warnatsch, A., Ioannou, M., Hoving, D., Wang, Q., and Papayannopoulos, V. (2020). Histones, DNA, and Citrullination Promote Neutrophil Extracellular Trap Inflammation by Regulating the Localization and Activation of TLR4. *Cell reports* 31, 107602.
- Weber, A.G., Chau, A.S., Egeblad, M., Barnes, B.J., and Janowitz, T. (2020). Nebulized in-line endotracheal dornase alfa and albuterol administered to mechanically ventilated COVID-19 patients: a case series. *Mol Med* 26, 91.
- Xiang, Q., Feng, Z., Diao, B., Tu, C., Qiao, Q., Yang, H., Zhang, Y., Wang, G., Wang, H., Wang, C., *et al.* (2021). SARS-CoV-2 Induces Lymphocytopenia by Promoting Inflammation and Decimates Secondary Lymphoid Organs. *Front Immunol* 12, 661052.
- Xu, J., Zhang, X., Pelayo, R., Monestier, M., Ammollo, C.T., Semeraro, F., Taylor, F.B., Esmon, N.L., Lupu, F., and Esmon, C.T. (2009). Extracellular histones are major mediators of death in sepsis. *Nat Med* 15, 1318-1321.
- Zhou, F., Yu, T., Du, R., Fan, G., Liu, Y., Liu, Z., Xiang, J., Wang, Y., Song, B., Gu, X., *et al.* (2020). Clinical course and risk factors for mortality of adult inpatients with COVID-19 in Wuhan, China: a retrospective cohort study. *Lancet* 395, 1054-1062.
- Zuo, Y., Yalavarthi, S., Shi, H., Gockman, K., Zuo, M., Madison, J.A., Blair, C., Weber, A., Barnes, B.J., Egeblad, M., *et al.* (2020). Neutrophil extracellular traps in COVID-19. *JCI Insight* 5.

## Figure 1

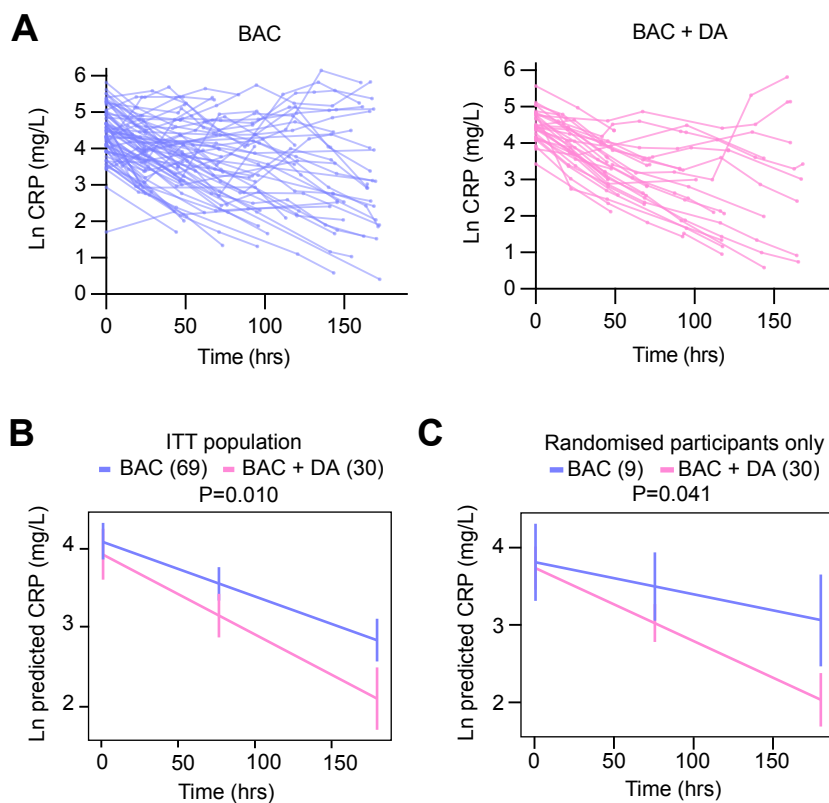



## Figure 2

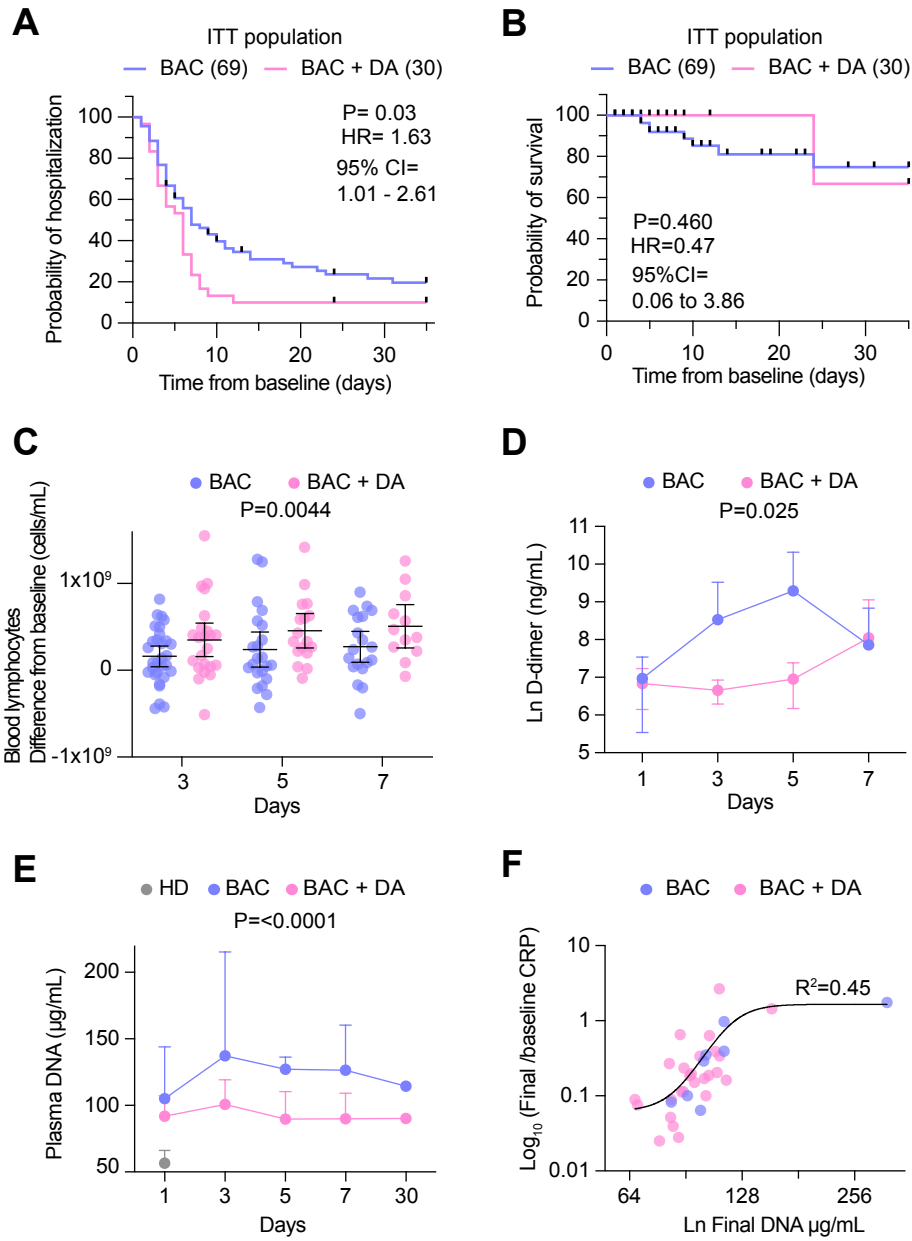

## Supplementary Figure 1

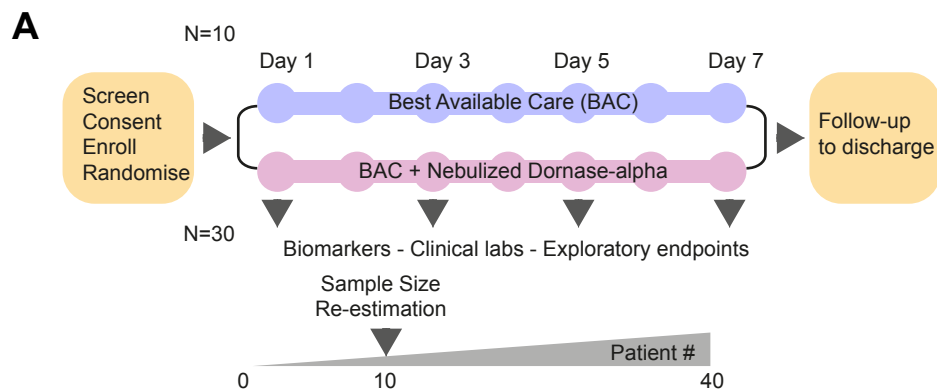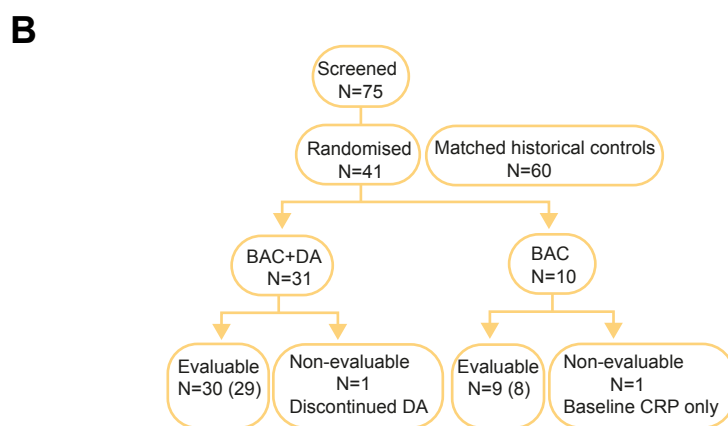

## Supplementary Figure 2

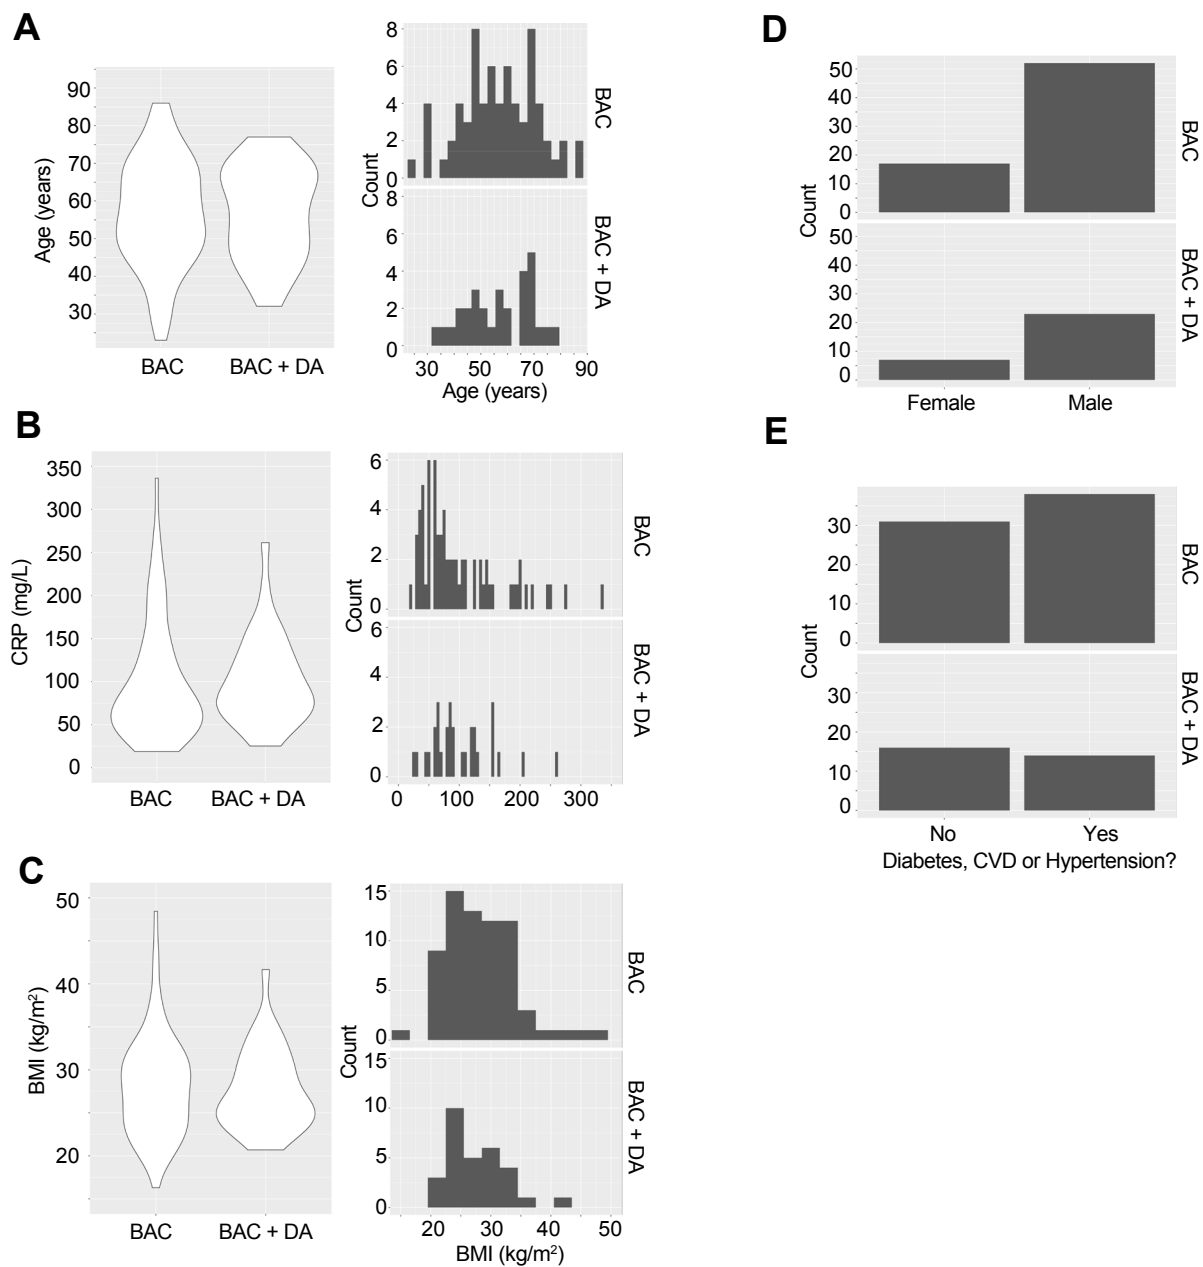

## Supplementary Figure 3

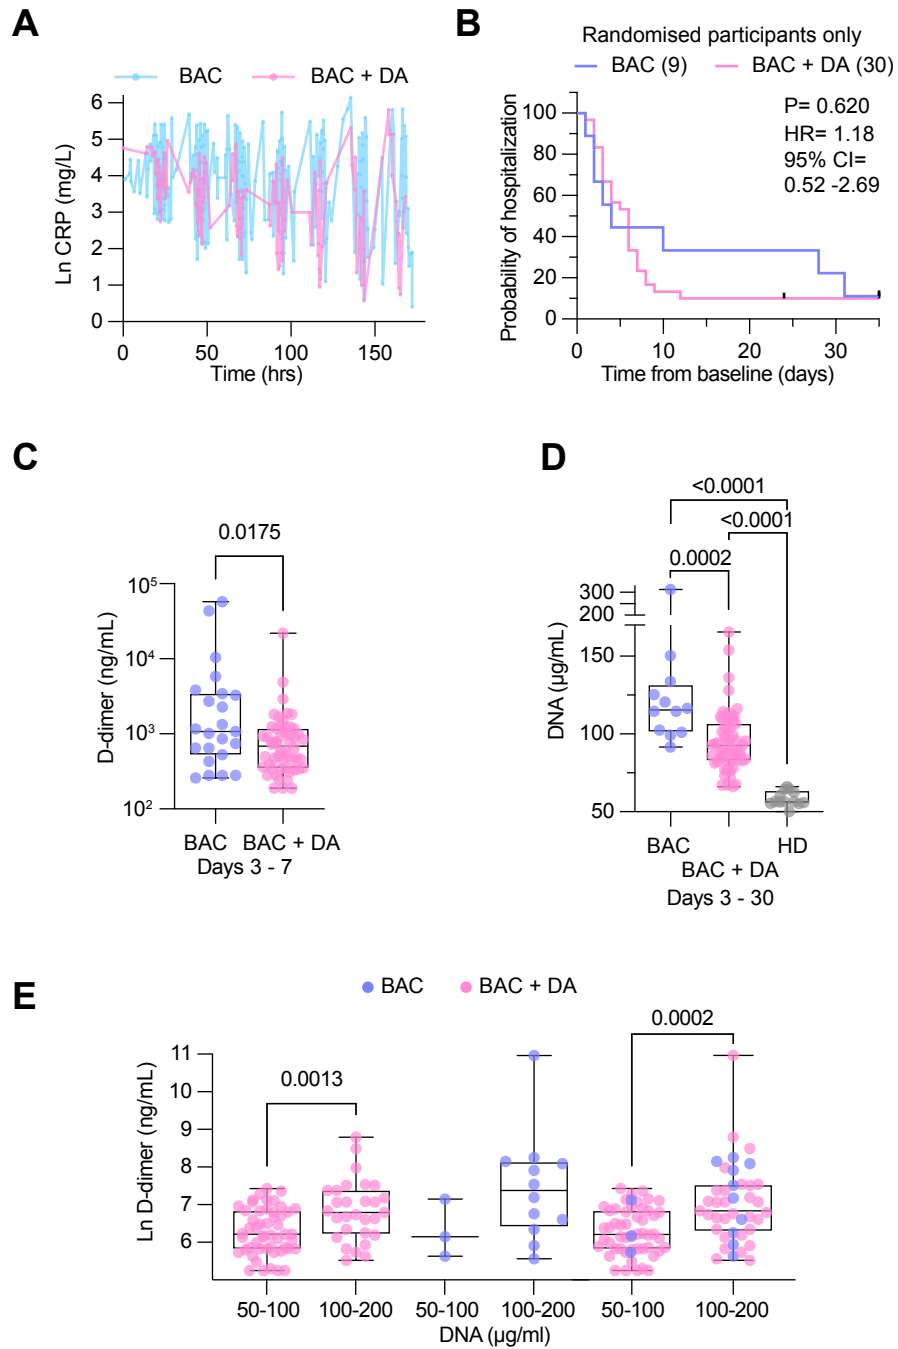

## Tables

Table 1. Patient baseline characteristics

|                                | <b>Random<br/>ised to<br/>BAC +<br/>dornase-<br/>alfa<br/>(N=30)</b> | <b>Random<br/>ised to<br/>BAC<br/>(N=9)</b> | <b>Historic<br/>al<br/>controls<br/>(N=60)</b> | <b>All BAC<br/>(N=69)</b> | <b>Total<br/>(N=99)</b> |
|--------------------------------|----------------------------------------------------------------------|---------------------------------------------|------------------------------------------------|---------------------------|-------------------------|
| <b>Age (years)</b>             |                                                                      |                                             |                                                |                           |                         |
| N                              | 30                                                                   | 9                                           | 60                                             | 69                        | 99                      |
| Mean                           | 56.8                                                                 | 53.3                                        | 57.3                                           | 56.8                      | 56.8                    |
| SD                             | 12.5                                                                 | 13.7                                        | 14.5                                           | 14.3                      | 13.7                    |
| Median                         | 58.0                                                                 | 53.0                                        | 57.0                                           | 57.0                      | 57.0                    |
| Min                            | 32.0                                                                 | 31.0                                        | 23.0                                           | 23.0                      | 23.0                    |
| Max                            | 77.0                                                                 | 76.0                                        | 86.0                                           | 86.0                      | 86.0                    |
| <b>Gender</b>                  |                                                                      |                                             |                                                |                           |                         |
| Female N (%)                   | 7 (23.3)                                                             | 2 (22.2)                                    | 15 (25.0)                                      | 17 (24.6)                 | 24 (24.2)               |
| Male N (%)                     | 23 (76.7)                                                            | 7 (77.8)                                    | 45 (75.0)                                      | 52 (75.4)                 | 75 (75.8)               |
| <b>BMI (kg/m<sup>2</sup>)</b>  |                                                                      |                                             |                                                |                           |                         |
| N                              | 30                                                                   | 9                                           | 60                                             | 69                        | 99                      |
| Mean                           | 27.8                                                                 | 30.8                                        | 27.8                                           | 28.2                      | 28.0                    |
| SD                             | 4.7                                                                  | 7.8                                         | 5.6                                            | 6.0                       | 5.6                     |
| Median                         | 26.5                                                                 | 28.9                                        | 27.9                                           | 28.2                      | 27.7                    |
| Min                            | 20.7                                                                 | 22.6                                        | 16.3                                           | 16.3                      | 16.3                    |
| Max                            | 41.7                                                                 | 48.4                                        | 43.8                                           | 48.4                      | 48.4                    |
| <b>Baseline CRP<br/>(mg/L)</b> |                                                                      |                                             |                                                |                           |                         |
| N                              | 30                                                                   | 9                                           | 60                                             | 69                        | 99                      |
| Mean                           | 101.9                                                                | 91.9                                        | 100.7                                          | 99.5                      | 100.2                   |
| SD                             | 52.2                                                                 | 68.1                                        | 68.3                                           | 67.8                      | 63.3                    |

|                        |           |          |           |           |           |
|------------------------|-----------|----------|-----------|-----------|-----------|
| Median                 | 86.3      | 74.6     | 75.8      | 75.3      | 79.6      |
| Min                    | 25.2      | 18.9     | 30.8      | 18.9      | 18.9      |
| Max                    | 261.5     | 221.6    | 336.4     | 336.4     | 336.4     |
| <hr/>                  |           |          |           |           |           |
| <b>Key Comorbidity</b> |           |          |           |           |           |
| No N (%)               | 16 (53.3) | 3 (33.3) | 28 (46.7) | 31 (44.9) | 47 (47.5) |
| Yes N (%)              | 14 (46.7) | 6 (66.7) | 32 (53.3) | 38 (55.1) | 52 (52.5) |
| <hr/>                  |           |          |           |           |           |

Table 2. Primary endpoint and sensitivity analysis:

| CRP (mg/L)                                                                                                                                  | Randomised to BAC + dornase-alfa | BAC                       | Difference between BAC + dornase-alfa and BAC | p-value* |
|---------------------------------------------------------------------------------------------------------------------------------------------|----------------------------------|---------------------------|-----------------------------------------------|----------|
| <b>Primary analysis of Primary Endpoint: ITT population including all individuals: (BAC + dornase-alfa, BAC &amp; historical controls).</b> |                                  |                           |                                               |          |
| N                                                                                                                                           | 30                               | 69                        |                                               |          |
| Least-squares mean log(CRP) * (95% CI)                                                                                                      | 3.15<br>(2.87 to 3.42)           | 3.55<br>(3.35 to 3.75)    | -0.4<br>(-0.71 to -0.10)                      | 0.010    |
| Least-square mean CRP ** (95% CI)                                                                                                           | 23.23<br>(17.71 to 30.46)        | 34.82<br>(28.55 to 42.47) | 0.67<br>(0.49 to 0.91)                        |          |
| <b>Sensitivity Analyses</b>                                                                                                                 |                                  |                           |                                               |          |
| <b>PP population including all individuals: (BAC + dornase-alfa, BAC &amp; historical controls)</b>                                         |                                  |                           |                                               |          |
| N                                                                                                                                           | 29                               | 68                        |                                               |          |
| Least-squares mean log(CRP)* (95% CI)                                                                                                       | 3.12<br>(2.85 to 3.39)           | 3.55<br>(3.36 to 3.74)    | -0.43<br>(-0.73 to -0.13)                     | 0.006    |
| Least-square mean CRP** (95% CI)                                                                                                            | 22.64<br>(17.35 to 29.54)        | 34.82<br>(27.7 to 42.21)  | 0.65<br>(0.48 to 0.88)                        |          |
| <b>ITT population including randomised individuals only</b>                                                                                 |                                  |                           |                                               |          |
| N                                                                                                                                           | 30                               | 9                         |                                               |          |
| Least-squares mean log(CRP)* (95% CI)                                                                                                       | 3.1<br>(2.84 to 3.35)            | 3.59<br>(3.13 to 4.06)    | -0.5<br>(-0.97 to -0.02)                      | 0.041    |
| Least-square mean CRP** (95% CI)                                                                                                            | 22.12<br>(17.16 to 28.5)         | 36.34<br>(22.79 to 57.94) | 0.61<br>(0.38 to 0.98)                        |          |
| <b>ITT population including randomised individuals to BAC + dornase-alfa and historical controls only.</b>                                  |                                  |                           |                                               |          |
| N                                                                                                                                           | 30                               | 60                        |                                               |          |
| Least-squares mean log(CRP)* (95% CI)                                                                                                       | 3.18<br>(2.91 to 3.45)           | 3.56<br>(3.35 to 3.76)    | -0.37<br>(-0.68 to -0.06)                     | 0.019    |

|                                        |                          |                           |                       |  |
|----------------------------------------|--------------------------|---------------------------|-----------------------|--|
| Least-square mean<br>CRP**<br>(95% CI) | 24.09<br>(18.36 to 31.6) | 35.03<br>(28.44 to 43.15) | 0.69<br>(0.5 to 0.94) |  |
|----------------------------------------|--------------------------|---------------------------|-----------------------|--|

---

**ITT population including randomised individuals to BAC and historical controls only, i.e. the comparator population**

---

|                                             |                          |                           |                        |       |
|---------------------------------------------|--------------------------|---------------------------|------------------------|-------|
| N                                           | 9                        | 60                        |                        |       |
| Least-squares mean<br>log(CRP)*<br>(95% CI) | 3.78<br>(3.23 to 4.33)   | 3.53<br>(3.3 to 3.77)     | 0.24<br>(-0.32 to 0.8) | 0.386 |
| Least-square mean<br>CRP**<br>(95% CI)      | 43.69<br>(25.18 to 75.8) | 34.23<br>(27.11 to 43.24) | 1.28<br>(0.73 to 2.23) |       |

---

**Area under the log(CRP), standardised by days followed up, over 7 days follow-up: ITT population including all individuals (BAC + dornase-alfa, BAC & historical controls).**

---

|                                                     |                        |                        |                           |       |
|-----------------------------------------------------|------------------------|------------------------|---------------------------|-------|
| N                                                   | 30                     | 69                     |                           |       |
| Least-squares mean<br>area <sup>a</sup><br>(95% CI) | 3.45<br>(3.22 to 3.68) | 3.72<br>(3.55 to 3.88) | -0.27<br>(-0.53 to -0.01) | 0.043 |

---

**ITT population including all individuals: (BAC + dornase-alfa, BAC & historical controls matched including last pre-Dexamethasone CRP value).**

---

|                                             |                           |                           |                           |       |
|---------------------------------------------|---------------------------|---------------------------|---------------------------|-------|
| N                                           | 30                        | 69                        |                           |       |
| Least-squares mean<br>log(CRP)*<br>(95% CI) | 3.16<br>(2.83 to 3.5)     | 3.69<br>(3.44 to 3.93)    | -0.53<br>(-0.91 to -0.14) | 0.007 |
| Least-square mean<br>CRP**<br>(95% CI)      | 23.57<br>(16.85 to 32.97) | 39.92<br>(31.32 to 50.89) | 0.59<br>(0.4 to 0.87)     |       |

---

**ITT population including all individuals: (BAC + dornase-alfa, BAC & historical controls). Stratified by BAC treatment**

---

**No Remdesivir or Tocilizumab**

|                                             |                           |                           |                          |       |
|---------------------------------------------|---------------------------|---------------------------|--------------------------|-------|
| N                                           | 12                        | 39                        |                          |       |
| Least-squares mean<br>log(CRP)*<br>(95% CI) | 3.29<br>(2.83 to 3.76)    | 3.75<br>(3.45 to 4.04)    | -0.45<br>(-0.96 to 0.05) | 0.079 |
| Least-square mean<br>CRP**<br>(95% CI)      | 26.97<br>(16.87 to 43.11) | 42.35<br>(31.44 to 57.04) | 0.64<br>(0.38 to 1.06)   |       |

---

**Remdesivir no Tocilizumab**



|                                       |                           |                           |                         |       |
|---------------------------------------|---------------------------|---------------------------|-------------------------|-------|
| N                                     | 16                        | 23                        |                         |       |
| Least-squares mean log(CRP)* (95% CI) | 3.16<br>(2.79 to 3.53)    | 3.5<br>(3.18 to 3.83)     | -0.35<br>(-0.79 to 0.1) | 0.123 |
| Least-square mean CRP** (95% CI)      | 23.53<br>(16.29 to 33.99) | 33.26<br>(23.97 to 46.15) | 0.71<br>(0.45 to 1.1)   |       |
| <hr/>                                 |                           |                           |                         |       |
| <b>Tocilizumab no Remdesivir</b>      |                           |                           |                         |       |
| N                                     | 1                         | 5                         |                         |       |
| <hr/>                                 |                           |                           |                         |       |
| <b>Remdesivir and Tocilizumab</b>     |                           |                           |                         |       |
| N                                     | 1                         | 2                         |                         |       |

\* From linear repeated measures model, adjusted for natural log(baseline CRP, age, sex, BMI, serious condition, time, treatment, a treatment\*time interaction, and subject as a random effect. Least squares means compared at mean follow-up time.

\*\* Antilog of estimates from \*. Ratio of BAC + dorna-alfa: BAC shown in the difference column.

<sup>a</sup> From linear model, adjusted for natural log(baseline CRP, age, sex, BMI, serious condition, and treatment.

Table 3. Secondary Endpoints

| Secondary Endpoints                                    | Randomised to BAC + dornase-alfa | BAC                 | Difference between BAC + dornase-alfa and BAC | p-value* |
|--------------------------------------------------------|----------------------------------|---------------------|-----------------------------------------------|----------|
| <b>Time to discharge from hospital (days)</b>          |                                  |                     |                                               |          |
| Number discharged                                      | 27                               | 51                  |                                               |          |
| Median time to discharge <sup>a</sup>                  | 6                                | 7                   | -1                                            |          |
| (95% CI)                                               | (4 to 7)                         | (6 to 12)           |                                               |          |
| Hazard ratio <sup>b</sup>                              |                                  |                     | 1.63                                          | 0.030    |
| (95% CI)                                               |                                  |                     | (1.01 to 2.61)                                |          |
| <b>D-dimer (ug/L) FEU<sup>d</sup></b>                  |                                  |                     |                                               |          |
| N                                                      | 28                               | 11                  |                                               |          |
| Least-square mean <sup>c</sup>                         | 570.78                           | 1656.96             | 0.34                                          | 0.004    |
| (95% CI)                                               | (384.51 to 847.3)                | (876.93 to 3130.81) | (0.17 to 0.69)                                |          |
| <b>Lymphocyte count (<math>\times 10^9/L</math>)**</b> |                                  |                     |                                               |          |
| N                                                      | 30                               | 61                  |                                               |          |
| Least-square mean <sup>c</sup>                         | 1.08                             | 0.87                | 1.25                                          | 0.021    |
| (95% CI)                                               | (0.92 to 1.27)                   | (0.76 to 0.98)      | (1.03 to 1.51)                                |          |
| <b>Procalcitonin levels (ng/mL)</b>                    |                                  |                     |                                               |          |
| N                                                      | 26                               | 7                   |                                               |          |
| Least-square mean <sup>c</sup>                         | 0.18                             | 1.31                | -1.13                                         | 0.005    |
| (95% CI)                                               | (-0.2 to 0.56)                   | 0.56 to 2.05)       | (-1.88 to -0.37)                              |          |

a Estimated from Kaplan-Meier curve.

b From Cox proportional hazard model, adjusting for age, baseline CRP and treatment

c From linear repeated measures model, adjusted for baseline endpoint, age, sex, BMI, serious condition, time, treatment, a treatment\*time interaction, and subject as a random effect. Least squares means compared at mean follow-up time.

d Modelled by log transforming the outcome. Estimates shown are the antilog of the estimates from the fitted model. Ratio of BAC + dornase-alfa: BAC shown in the difference column.

\* From linear repeated measures model, adjusted for natural log(baseline CRP), age, sex, BMI, serious condition, time, treatment, a treatment\*time interaction, and subject as a random effect. Least squares means compared at mean follow-up time.

\*\* Antilog of estimates from \*. Ratio of BAC + dorna-alfa: BAC shown in the difference column.

**Supplementary Tables:**

Table S1. Randomised individuals and historical control, additional baseline characteristics. characteristics: white blood cell count, neutrophil count, procalcitonin count and D-dimer

|                                                   | <b>Randomised<br/>to BAC +<br/>dornase-alfa<br/>(N=30)</b> | <b>Randomised<br/>to BAC<br/>(N=9)</b> | <b>Historical<br/>controls<br/>(N=60)</b> | <b>All BAC<br/>(N=69)</b> | <b>Total<br/>(N=99)</b> |
|---------------------------------------------------|------------------------------------------------------------|----------------------------------------|-------------------------------------------|---------------------------|-------------------------|
| <b>White blood cell count (×10<sup>9</sup>/L)</b> |                                                            |                                        |                                           |                           |                         |
| N                                                 | 30                                                         | 9                                      | 60                                        | 69                        | 99                      |
| Mean                                              | 6.7                                                        | 7.0                                    | 10.6                                      | 10.2                      | 9.1                     |
| SD                                                | 2.5                                                        | 2.7                                    | 9.2                                       | 8.7                       | 7.6                     |
| Median                                            | 6.5                                                        | 7.0                                    | 9.5                                       | 8.9                       | 7.9                     |
| Min                                               | 3.1                                                        | 1.8                                    | 1.8                                       | 1.8                       | 1.8                     |
| Max                                               | 12.9                                                       | 10.3                                   | 72.6                                      | 72.6                      | 72.6                    |
| <b>Neutrophil count (×10<sup>9</sup>/L)</b>       |                                                            |                                        |                                           |                           |                         |
| N                                                 | 30                                                         | 9                                      | 60                                        | 69                        | 99                      |
| Mean                                              | 5.7                                                        | 5.6                                    | 9.1                                       | 8.7                       | 7.8                     |
| SD                                                | 2.3                                                        | 2.6                                    | 8.8                                       | 8.4                       | 7.2                     |
| Median                                            | 5.3                                                        | 5.8                                    | 7.9                                       | 7.9                       | 6.7                     |
| Min                                               | 2.4                                                        | 1.2                                    | 1.2                                       | 1.2                       | 1.2                     |
| Max                                               | 10.9                                                       | 8.6                                    | 69.5                                      | 69.5                      | 69.5                    |
| <b>Lymphocyte count (×10<sup>9</sup>/L)</b>       |                                                            |                                        |                                           |                           |                         |
| N                                                 | 30                                                         | 9                                      | 60                                        | 69                        | 99                      |

|        |     |     |     |     |     |
|--------|-----|-----|-----|-----|-----|
| Mean   | 0.7 | 0.9 | 0.9 | 0.9 | 0.9 |
| SD     | 0.3 | 0.4 | 0.5 | 0.5 | 0.5 |
| Median | 0.5 | 0.9 | 0.8 | 0.8 | 0.7 |
| Min    | 0.2 | 0.4 | 0.1 | 0.1 | 0.1 |
| Max    | 1.5 | 1.5 | 3.7 | 3.7 | 3.7 |

---

**Monocyte count ( $\times 10^9/L$ )**

|        |     |     |     |     |     |
|--------|-----|-----|-----|-----|-----|
| N      | 30  | 9   | 60  | 69  | 99  |
| Mean   | 0.4 | 0.4 | 0.5 | 0.5 | 0.4 |
| SD     | 0.2 | 0.3 | 0.3 | 0.3 | 0.3 |
| Median | 0.3 | 0.3 | 0.4 | 0.4 | 0.4 |
| Min    | 0.1 | 0.1 | 0.1 | 0.1 | 0.1 |
| Max    | 0.9 | 0.8 | 1.7 | 1.7 | 1.7 |

---

**Eosinophil count ( $\times 10^9/L$ )**

|        |     |     |     |     |     |
|--------|-----|-----|-----|-----|-----|
| N      | 30  | 9   | 60  | 69  | 99  |
| Mean   | 0.0 | 0.0 | 0.0 | 0.0 | 0.0 |
| SD     | 0.1 | 0.0 | 0.1 | 0.1 | 0.1 |
| Median | 0.0 | 0.0 | 0.0 | 0.0 | 0.0 |
| Min    | 0.0 | 0.0 | 0.0 | 0.0 | 0.0 |
| Max    | 0.2 | 0.1 | 0.6 | 0.6 | 0.6 |

---

**Basophil count ( $\times 10^9/L$ )**

|   |    |   |    |    |    |
|---|----|---|----|----|----|
| N | 30 | 9 | 60 | 69 | 99 |
|---|----|---|----|----|----|

|                                             |        |        |        |        |        |
|---------------------------------------------|--------|--------|--------|--------|--------|
| Mean                                        | 0.0    | 0.0    | 0.0    | 0.0    | 0.0    |
| SD                                          | 0.0    | 0.0    | 0.0    | 0.0    | 0.0    |
| Median                                      | 0.0    | 0.0    | 0.0    | 0.0    | 0.0    |
| Min                                         | 0.0    | 0.0    | 0.0    | 0.0    | 0.0    |
| Max                                         | 0.2    | 0.1    | 0.1    | 0.1    | 0.2    |
| <hr/>                                       |        |        |        |        |        |
| <b>Procalcitonin count (ng/ml)</b>          |        |        |        |        |        |
| N                                           | 27     | 8      | 1      | 9      | 36     |
| Mean                                        | 0.3    | 0.3    | 19.3   | 2.4    | 0.8    |
| SD                                          | 0.4    | 0.3    | -      | 6.3    | 3.2    |
| Median                                      | 0.1    | 0.2    | 19.3   | 0.2    | 0.2    |
| Min                                         | 0.1    | 0.1    | 19.3   | 0.1    | 0.1    |
| Max                                         | 1.8    | 0.8    | 19.3   | 19.3   | 19.3   |
| <hr/>                                       |        |        |        |        |        |
| <b>D-dimer (ug/L) FEU</b>                   |        |        |        |        |        |
| N                                           | 30     | 9      | 15     | 24     | 54     |
| Mean                                        | 885.0  | 909.1  | 1059.3 | 1003.0 | 937.4  |
| SD                                          | 1154.5 | 1054.1 | 1115.0 | 1071.8 | 1109.6 |
| Median                                      | 545.0  | 570.0  | 600.0  | 585.0  | 570.0  |
| Min                                         | 190.0  | 1.9    | 280.0  | 1.9    | 1.9    |
| Max                                         | 6580.0 | 3570.0 | 4460.0 | 4460.0 | 6580.0 |
| <hr/>                                       |        |        |        |        |        |
| <b>WHO ordinal COVID-19 severity score*</b> |        |        |        |        |        |
| N                                           | 30     | 9      | 0      | 9      | 39     |

|        |     |     |   |     |     |
|--------|-----|-----|---|-----|-----|
| Mean   | 5.0 | 5.0 | - | 5.0 | 5.0 |
| SD     | 0.0 | 0.5 | - | 0.5 | 0.2 |
| Median | 5.0 | 5.0 | - | 5.0 | 5.0 |
| Min    | 5.0 | 4.0 | - | 4.0 | 4.0 |
| Max    | 5.0 | 6.0 | - | 6.0 | 6.0 |

---

Table S2. Randomised participants only

|                                                      | Randomised to<br>BAC + dornase-<br>alfa | Randomised to<br>BAC only      | Difference<br>between BAC +<br>dornase-alfa and<br>BAC | p-<br>value* |
|------------------------------------------------------|-----------------------------------------|--------------------------------|--------------------------------------------------------|--------------|
| <b>Time to discharge from hospital (days)</b>        |                                         |                                |                                                        |              |
| Number discharged                                    | 27                                      | 8                              | 19                                                     |              |
| Median time to discharge**                           | 6<br>(4 to 7)                           | 4<br>(2 to-n.a.)               | 2                                                      |              |
| Hazard ratio***                                      |                                         |                                | 1.18<br>(0.53 to 2.69)                                 | 0.62         |
| <b>D-dimer (ug/L) FEU</b>                            |                                         |                                |                                                        |              |
| N                                                    | 28                                      | 6                              |                                                        |              |
| Least-squares mean (log)*<br>(95% CI)                | 6.37<br>(6.01 to 6.74)                  | 7.55<br>(6.71 to 8.39)         | -1.18<br>(-2.02 to -0.33)                              | 0.008        |
| Least-square mean**<br>(95% CI)                      | 586.87<br>(407.44 to 845.31)            | 1903.82<br>(821.57 to 4411.69) | 0.31<br>(0.13 to 0.72)                                 |              |
| <b>Lymphocyte count (<math>\times 10^9/L</math>)</b> |                                         |                                |                                                        |              |
| N                                                    | 30                                      | 9                              |                                                        |              |
| Least-squares mean (log)*<br>(95% CI)                | -0.06<br>(-0.25 to 0.12)                | -0.46<br>(-0.82 to -0.1)       | 0.4<br>(0.03 to 0.76)                                  | 0.033        |
| Least-square mean**<br>(95% CI)                      | 0.94<br>(0.78 to 1.13)                  | 0.63<br>(0.44 to 0.9)          | 1.49<br>(1.03 to 2.13)                                 |              |
| <b>Procalcitonin count (ng/ml)</b>                   |                                         |                                |                                                        |              |
| N                                                    | 26                                      | 7                              |                                                        |              |
| Least-square mean*<br>(95% CI)                       | 0.18<br>(-0.2 to 0.56)                  | 1.31<br>(0.56 to 2.05)         | -1.13<br>(-1.88 to -0.37)                              | 0.005        |

\*From log-rank test with treatment as a stratification variable.

\*\*Estimated from Kaplan-Meier curve.

\*\*\*From Cox proportional hazard model, adjusting for age, baseline CRP and treatment.

Table S3. Secondary clinical endpoints

- Admission to ICU:
  - Over 7 days of follow up BAC + dornase-alfa versus BAC alone % of participants admitted to ICU (23.3% versus 21.74%), p=0.866,
  - length of ICU stay, LSM 21.25 (95% CI, 4.65 to 37.84) hours versus 19.85 (95% CI, 8.00 to 31.70) hours, p=0.883.
  - over 35-day follow-up, LSM 55.21 95% CI, -23.59 to 134.00) hours versus 60.60 (95% CI, 4.34 to 116.86) hours, p=0.905.
  - At any point during 35 days follow-up, 23% of the BAC + dornase-alfa group were admitted to ICU compared to 23.19% in the BAC group, p= 0.983.
- time requiring oxygen at
  - 7 days, LSM 94.32 (95% CI, 72.8 to 115.79) hours, versus 88.96 (95% CI, 73.64 to 104.29) hours, p=0.662, or
  - 35 days, LSM 133.22 (95% CI, 52.01 to 214.43) hours versus 156.35 (95% CI, 98.36, 214.33) hours, p=0.618.
  - At 35 day follow up mean oxygen use tends to a reduction of 123 hours with BAC + dornase-alfa, versus 241 hours for BAC, p=0.187
- participants that required mechanical ventilation and mean length of ventilation at either
  - 7- or
  - 35-days follow-up,
- Superadded bacterial pneumonia at either
  - 7- or
  - 35-days follow-up:

---

**Time on Oxygen over 7 days follow-up (hours)**

|                             |                         |                         |                        |       |
|-----------------------------|-------------------------|-------------------------|------------------------|-------|
| N                           | 30                      | 69                      |                        |       |
| Least-square mean* (95% CI) | 94.32 (72.86 to 115.79) | 88.96 (73.64 to 104.29) | 5.36 (-18.92 to 29.65) | 0.662 |

**Time on Oxygen over 35 days follow-up (hours)**

|                             |                          |                          |                           |       |
|-----------------------------|--------------------------|--------------------------|---------------------------|-------|
| N                           | 30                       | 69                       |                           |       |
| Least-square mean* (95% CI) | 133.22 (52.01 to 214.43) | 156.35 (98.36 to 214.33) | -23.12 (-115.02 to 67.77) | 0.618 |



---

**Proportion of individuals on mechanical ventilation over 7 days follow-up**

|                         |           |           |                        |       |
|-------------------------|-----------|-----------|------------------------|-------|
| N (%)                   | 5 (16.67) | 9 (13.04) | -4 (3.62)              |       |
| Odds ratio*<br>(95% CI) |           |           | 1.36<br>(0.39 to 4.66) | 0.628 |

---

**Proportion of individuals on mechanical ventilation over 35 days follow-up**

|                         |           |           |                        |       |
|-------------------------|-----------|-----------|------------------------|-------|
| N (%)                   | 5 (16.67) | 9 (13.04) | -4 (3.62)              |       |
| Odds ratio*<br>(95% CI) |           |           | 1.36<br>(0.39 to 4.66) | 0.628 |

---

\*From Logistic regression model, adjusted for age, sex, BMI, baseline CRP, serious condition and treatment.

---

**Proportion of individuals with Superadded Bacterial Pneumonia over 7 days follow-up**

|                         |                        |          |  |       |
|-------------------------|------------------------|----------|--|-------|
| N (%)                   | 1 (3.33)               | 3 (4.35) |  |       |
| Odds ratio*<br>(95% CI) | 0.9<br>(0.08 to 10.21) |          |  | 0.934 |

---

**Proportion of individuals with Superadded Bacterial Pneumonia over 35 days follow-up**

|                         |                         |          |  |       |
|-------------------------|-------------------------|----------|--|-------|
| N (%)                   | 2 (6.67)                | 3 (4.35) |  |       |
| Odds ratio*<br>(95% CI) | 1.81<br>(0.26 to 12.61) |          |  | 0.548 |

---

\*From Logistic regression model, adjusted for age, sex, BMI, baseline CRP, serious condition, and treatment.

Table S4. Safety

***Adverse Events in the BAC + dornase alfa group***

| <b>Subject</b> | <b>BAC + dornase-<br/>alfa, or BAC only?</b> | <b>Adverse event</b>                   | <b>Serious?</b> | <b>Relationship to<br/>study drug</b> |
|----------------|----------------------------------------------|----------------------------------------|-----------------|---------------------------------------|
| COV002         | Dornase-alfa +<br>BAC                        | Cough & SOB                            | No              | Not related                           |
| COV003         | Dornase-alfa +<br>BAC                        | Mild depression                        | No              | Not related                           |
| COV003         | Dornase-alfa +<br>BAC                        | Mild cognitive impairment              | No              | Not related                           |
| COV005         | Dornase-alfa +<br>BAC                        | Struggle to sleep                      | No              | Not related                           |
| COV005         | Dornase-alfa +<br>BAC                        | Transaminitis (ALT 91 - NR 10-35 iu/L) | No              | Not related                           |
| COV005         | Dornase-alfa +<br>BAC                        | Constipation                           | No              | Not related                           |
| COV007         | Dornase-alfa +<br>BAC                        | Blood stain in sputum                  | No              | Not related                           |
| COV012         | Dornase-alfa +<br>BAC                        | Small Pericardial Effusion             | No              | Not related                           |
| COV012         | Dornase-alfa +<br>BAC                        | Dysphonia                              | No              | Not related                           |
| COV012         | Dornase-alfa +<br>BAC                        | Hypercapnia                            | No              | Not related                           |
| COV013         | Dornase-alfa +<br>BAC                        | Ulcerative Colitis flare               | No              | Not related                           |
| COV013         | Dornase-alfa +<br>BAC                        | Bradycardia                            | No              | Not related                           |
| COV015         | Dornase-alfa +<br>BAC                        | Mechanical Fall                        | No              | Not related                           |
| COV015         | Dornase-alfa +<br>BAC                        | Dizziness                              | No              | Not related                           |
| COV018         | Dornase-alfa +<br>BAC                        | Dehydration                            | No              | Not related                           |

|        |                    |                                   |    |             |
|--------|--------------------|-----------------------------------|----|-------------|
| COV018 | Dornase-alfa + BAC | Lower Respiratory Tract Infection | No | Not related |
| COV018 | Dornase-alfa + BAC | Haemoptysis                       | No | Not related |
| COV020 | Dornase-alfa + BAC | Chest pain                        | No | Not related |
| COV022 | Dornase-alfa + BAC | Microcytic anaemia                | No | Not related |
| COV022 | Dornase-alfa + BAC | Elevated Blood glucose            | No | Not related |
| COV023 | Dornase-alfa + BAC | Tachypnoea (PR 32BPM)             | No | Not related |
| COV023 | Dornase-alfa + BAC | Hyperglycaemia (BM 14.9)          | No | Not related |
| COV031 | Dornase-alfa + BAC | Chest Pain                        | No | Not related |
| COV035 | Dornase-alfa + BAC | Left leg spasm                    | No | Not related |
| COV035 | Dornase-alfa + BAC | Rectal bleed due to haemorrhoids  | No | Not related |
| COV037 | Dornase-alfa + BAC | Chest Pain                        | No | Not related |
| COV002 | Dornase-alfa + BAC | Tingling of the mouth             | No | Definitely  |
| COV035 | Dornase-alfa + BAC | Headache                          | No | Unlikely    |

**Appendices:**

Supplementary appendix 1: Protocol

Supplementary appendix 2: Statistical Analysis Plan (SAP)
